# Supplementary material for: The “Journey” of Microplastics across the Marine Food Web in China’s Largest Fishing Ground
Source: MDPI journal article supplement (doi:10.3390/w15030445), 2023-01-22
Supplement: s1 [file s1]

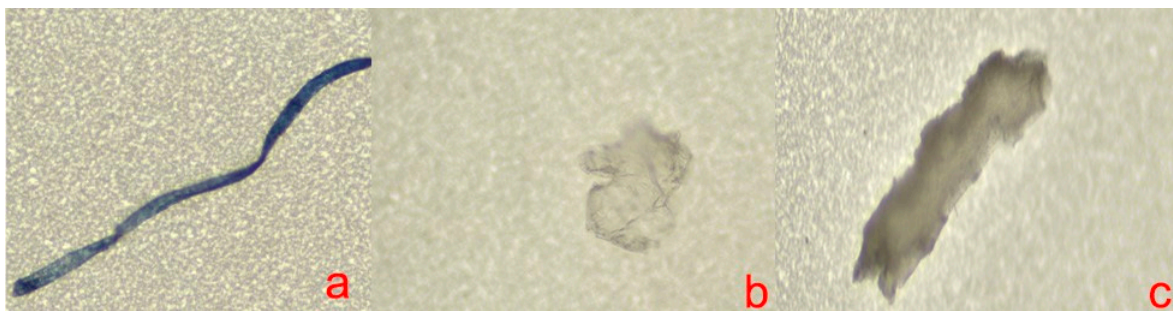

Figure S1. Some microscopic inspection images for microplastics. a blue fiber; b transparent film; c black fragment.
